# Supplementary material for: A phase 1 dose escalation and expansion study of Tarextumab (OMP-59R5) in patients with solid tumors
Source: Springer Nature journal article supplement (doi:10.1007/s10637-018-0714-6), 2018-12-28
Supplement: MOESM2 [file 16360366]

**Supplemental Table 1: Mean Tarextumab Pharmacokinetic Parameters After Weekly Dosing**

| Dose (mg/kg)     | Day | N | T <sub>1/2</sub> (days) | T <sub>max</sub> (days) | C <sub>max</sub> (µg/mL) | AUC <sub>last</sub> (day*µg/mL) | AUC <sub>0-inf</sub> (day*µg/mL) | AUC % Extrapolation (%) | CL (mL/day/kg) | V <sub>ss</sub> (mL/kg) | Accumulation Ratio <sup>c</sup> |
|------------------|-----|---|-------------------------|-------------------------|--------------------------|---------------------------------|----------------------------------|-------------------------|----------------|-------------------------|---------------------------------|
| 0.5 <sup>a</sup> | 0   | 1 | ND                      | 0.020                   | 3.37                     | 0.15                            | ND                               | ND                      | ND             | ND                      |                                 |
|                  | 49  | 0 | ND                      | ND                      | ND                       | ND                              | ND                               | ND                      | ND             | ND                      | ND                              |
| 1.0 <sup>b</sup> | 0   | 3 | 0.553                   | 0.020                   | 11.5                     | 4.95                            | 7.6                              | 41.8                    | 209            | 147.8                   |                                 |
|                  | 49  | 2 | 0.925                   | 0.040                   | 13.8                     | 13.2                            | 16.9                             | 26.0                    | 69.1           | 78.3                    | 1.76                            |
| 2.5              | 0   | 6 | 1.125                   | 0.030                   | 41.0                     | 48.2                            | 57.1                             | 15.0                    | 53.8           | 77.3                    |                                 |
|                  | 49  | 4 | 1.665                   | 0.030                   | 49.0                     | 86.7                            | 98.8                             | 13.9                    | 27.6           | 56.4                    | 2.00                            |
| 5.0              | 0   | 9 | 1.49                    | 0.024                   | 75.7                     | 124.1                           | 143.5                            | 15.6                    | 37.9           | 73.0                    |                                 |
|                  | 49  | 1 | 2.04                    | 0.060                   | 136.3                    | 330.0                           | 360.2                            | 8.5                     | 13.9           | 35.7                    | 1.42                            |

Abbreviations: AUC, area under the concentration-time curve; CL, clearance; C<sub>max</sub>, maximum plasma concentration after administration; T<sub>max</sub>, time to reach the observed maximum (peak) concentration; T<sub>1/2</sub>, half-life; V<sub>ss</sub>, volume of distribution at steady state.

<sup>a</sup> Three subjects were treated in this cohort; Subject 001001001 had serum concentration data with suspected assay interference and was not included in analysis;

Subject 001001002 had all samples except 5-minute postinfusion below detection limit, thus not included in this analysis.

<sup>b</sup> The AUC % extrapolations were larger than 20% at this dose level.

<sup>c</sup> Calculated as AUC<sub>last, Day 49</sub>/AUC<sub>last, Day 0</sub>.

ND: not determined due to insufficient data.

**Supplemental Table 2: Mean Tarextumab Pharmacokinetic Parameters After Every Other Week and Every 3 Weeks Dosing**

| <b>Dose (mg/kg)</b> | <b>Schedule</b> | <b>Day</b> | <b>N</b> | <b>T<sub>1/2</sub> (days)</b> | <b>T<sub>max</sub> (days)</b> | <b>C<sub>max</sub> (µg/mL)</b> | <b>AUC<sub>last</sub> (day*µg/mL)</b> | <b>AUC<sub>0-inf</sub> (day*µg/mL)</b> | <b>AUC % Extrapolation(%)</b> | <b>CL (mL/day/kg)</b> | <b>V<sub>ss</sub> (mL/kg)</b> | <b>Accumulation Ratio<sup>a</sup></b> |
|---------------------|-----------------|------------|----------|-------------------------------|-------------------------------|--------------------------------|---------------------------------------|----------------------------------------|-------------------------------|-----------------------|-------------------------------|---------------------------------------|
| 5.0                 | QoWk            | 0          | 6        | 1.39                          | 0.033                         | 87.7                           | <b>147</b>                            | 154                                    | 5.17                          | 34.2                  | 59.1                          | 1.13                                  |
|                     |                 | 42         | 4        | 1.48                          | 0.035                         | 75.2                           | 127                                   | 135                                    | 6.72                          | 42.7                  | 74.3                          |                                       |
| 7.5                 | QoWk            | 0          | 6        | 2.09                          | 0.027                         | 138                            | 284                                   | 309                                    | 7.30                          | 28.3                  | 64.8                          | 1.08                                  |
|                     |                 | 42         | 5        | 2.04                          | 0.028                         | 131                            | 270                                   | 287                                    | 6.30                          | 29.1                  | 68.5                          |                                       |
| 7.5                 | Q3Wk            | 0          | 6        | 2.03                          | 0.030                         | 120                            | 285                                   | 307                                    | 6.96                          | 25.3                  | 64.0                          | 1.04                                  |
|                     |                 | 42         | 3        | 1.74                          | 0.070                         | 129                            | 317                                   | 337                                    | 5.81                          | 22.4                  | 50.4                          |                                       |
| 10.0                | QoWk            | 0          | 3        | 1.59                          | 0.053                         | 164                            | 317                                   | 331                                    | 4.28                          | 30.3                  | 60.5                          | 1.48                                  |
|                     |                 | 42         | 1        | 1.76                          | 0.040                         | 206                            | 465                                   | 495                                    | 6.17                          | 20.2                  | 45.7                          |                                       |

Abbreviations: AUC, area under the concentration-time curve; CL, clearance; C<sub>max</sub>, maximum plasma concentration after administration; QoWk, every other week; Q3Wk, every 3 weeks; T<sub>max</sub>, time to reach the observed maximum (peak) concentration; T<sub>1/2</sub>, half-life; V<sub>ss</sub>, volume of distribution at steady state.

<sup>a</sup> Calculated as AUC<sub>last, Day 42</sub>/AUC<sub>last, Day 0</sub>.
